# Supplementary material for: Assessing Adverse Childhood Experiences in Young Refugees: A Systematic Review of Available Questionnaires
Source: Preprints.org preprint supplement (doi:10.20944/preprints202303.0027.v1), 2023-03-02
Supplement: Supplementary file 2 [file supplementary]

## Appendix 1: Search Strategy for Systematic Review

## PubMed

| **"child abuse"[MH] OR**  **"child abuse, sexual"[MH] OR**  Adverse Childhood Experience*[tw] OR  Adverse Childhood event*[tw] OR  Adverse child experience*[tw] OR  Adverse experience*[tw] OR  **"**household dysfunction**"**[tw] OR  "child abuse" OR  "childhood abuse" OR  "child neglect"[tw] OR  "childhood neglect"[tw] OR  "child maltreatment"[tw] OR  "childhood maltreatment"[tw] OR  "child trauma"[tw] OR  "childhood trauma"[tw] OR  "childhood stress"[tw] OR  "childhood violence"[tw] OR  "child violence"[tw] |
| --- |

| **child[MH] OR**  **infant[MH] OR**  **adolescent[MH] OR**  child*[tw] OR  infant[tw] OR  infants[tw] OR  adolescent[tw] OR  adolescents[tw] OR  baby[tw] OR  babies[tw] OR  toddler[tw] OR  toddlers[tw] OR  teenager[tw] OR  teenagers[tw] OR  teen[tw] OR  teens[tw] OR  preteen[tw] OR  preteens[tw] OR  youth[tw] |
| --- |

| Questionnaire*[tw] OR  survey*[tw] |
| --- |

**Bemerkungen**

**Filter age:** NOT ("adult"[Mesh] NOT ("infant"[Mesh] OR "child"[Mesh] OR "adolescent"[Mesh]))

## Web of Science Core Collection

| "Adverse Childhood Experience*" OR  "Adverse Childhood event*" OR  "Adverse child experience*" OR  "Adverse experience*" OR  "household dysfunction" OR  "child abuse" OR  "childhood abuse" OR  "child neglect" OR  "childhood neglect" OR  "child maltreatment" OR  "childhood maltreatment" OR  "child trauma" OR  "childhood trauma" OR  "childhood stress" OR  "childhood violence" OR  "child violence" |
| --- |

| "child*" OR  "infant" OR  "infants" OR  "adolescent" OR  "adolescents" OR  "baby" OR  "babies" OR  "toddler" OR  "toddlers" OR  "teenager" OR  "teenagers" OR  "teen" OR  "teens" OR  "preteen" OR  "preteens" OR  "youth" |
| --- |

| "Questionnaire*" OR  "survey*" |
| --- |

**Bemerkungen**

Filter: Age Groups: Childhood (birth-12 yrs), Adolescence (13-17 yrs)

Recherche mit der Einstellung Title. Eingrenzung Publikationen ab 2008

## PsychInfo

| **DE "Child Abuse" OR**  "Adverse Childhood Experience*" OR  "Adverse Childhood event*" OR  "Adverse child experience*" OR  "Adverse experience*" OR  "household dysfunction" OR  "child abuse" OR  "childhood abuse" OR  "child neglect" OR  "childhood neglect" OR  "child maltreatment" OR  "childhood maltreatment" OR  "child trauma" OR  "childhood trauma" OR  "childhood stress" OR  "childhood violence" OR  "child violence" |
| --- |

| "child*" OR  "infant" OR  "infants" OR  "adolescent" OR  "adolescents" OR  "baby" OR  "babies" OR  "toddler" OR  "toddlers" OR  "teenager" OR  "teenagers" OR  "teen" OR  "teens" OR  "preteen" OR  "preteens" OR  "youth" |
| --- |

| "Questionnaire*" OR  "survey*" |
| --- |

## Academic Search Complete (published first as Premier) (via EBSCO host)

| "Adverse Childhood Experience*" OR  "Adverse Childhood event*" OR  "Adverse child experience*" OR  "Adverse experience*" OR  "household dysfunction" OR  "child abuse" OR  "childhood abuse" OR  "child neglect" OR  "childhood neglect" OR  "child maltreatment" OR  "childhood maltreatment" OR  "child trauma" OR  "childhood trauma" OR  "childhood stress" OR  "childhood violence" OR  "child violence" |
| --- |

| "child*" OR  "infant" OR  "infants" OR  "adolescent" OR  "adolescents" OR  "baby" OR  "babies" OR  "toddler" OR  "toddlers" OR  "teenager" OR  "teenagers" OR  "teen" OR  "teens" OR  "preteen" OR  "preteens" OR  "youth" |
| --- |

| "Questionnaire*" OR  "survey*" |
| --- |
